# Supplementary material
Source: MDPI journal article supplement (https://www.mdpi.com/2076-3417/11/11/5300)
Supplement: s1 [file s1]

Supplementary material

Table S1. MS spectroscopic analysis of N,N-Dimethyl-L-proline hydroiodide.

| product ion | UPLC-(+)ESI-MS                           | UPLC-(-)ESI-MS                              |
|-------------|------------------------------------------|---------------------------------------------|
|             | TIC response 9.10 <sup>7</sup>           | TIC response 6.10 <sup>6</sup>              |
| m/z         | 144 (100) <sup>a</sup> MH <sup>+</sup>   | 127 (80) <sup>a</sup> I <sup>-</sup>        |
|             | 166 (5) <sup>a</sup> MNa <sup>+</sup>    | 277 (100) <sup>a</sup> (NaI) I <sup>-</sup> |
|             | 287 (15) <sup>a</sup> 2M Na <sup>+</sup> |                                             |

<sup>a</sup>Relative intensity

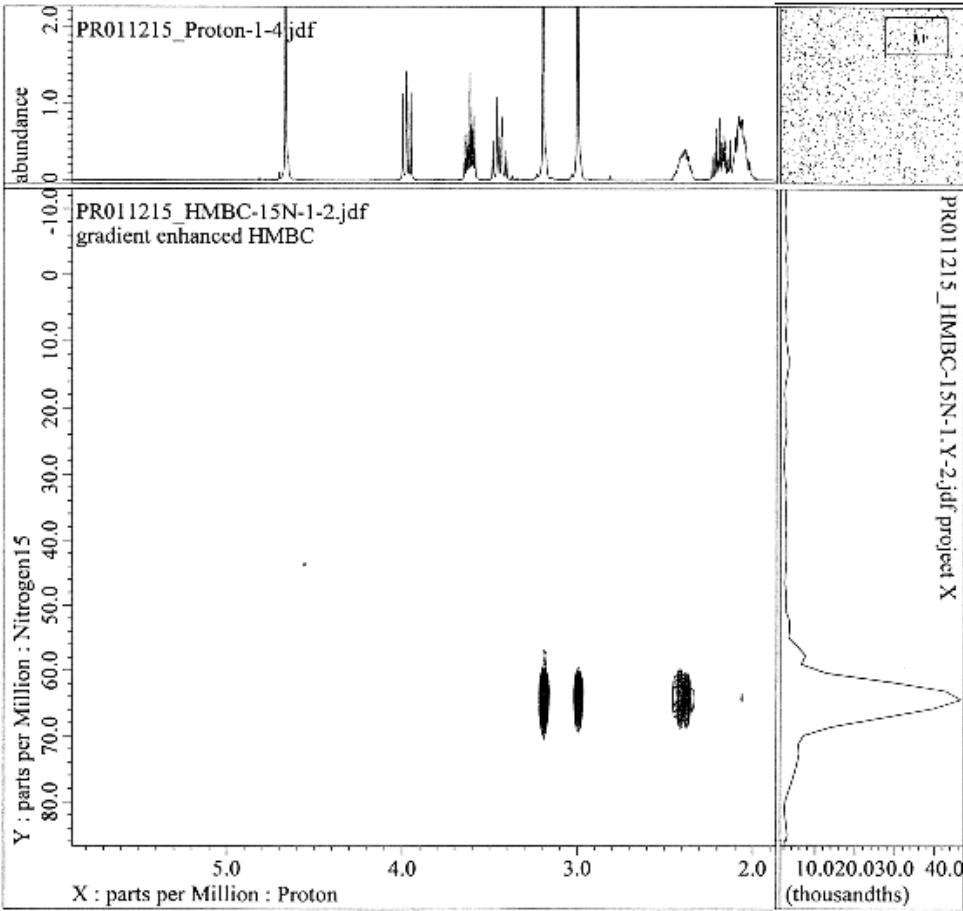

Figure S1. <sup>15</sup>N HMBC spectra of N,N-dimethyl-L-proline hydroiodide
